# Supplementary material for: Articular Tissue-Mimicking Organoids Derived from Mesenchymal Stem Cells and Induced Pluripotent Stem Cells
Source: MDPI journal article supplement (doi:10.3390/organoids1020011), 2022-11-14
Supplement: s1 [file s1]

## **Supplementary Information**

### **Articular Tissue-Mimicking Organoids Derived from Mesenchymal Stem Cells and Induced Pluripotent Stem Cells**

Zhong Alan Li <sup>1,2,#</sup>, Jiangyinzi Shang <sup>1</sup>, Shiqi Xiang <sup>1</sup>, Eileen N. Li <sup>1</sup>, Haruyo Yagi <sup>1</sup>,  
Kanyakorn Riewruja <sup>1</sup>, Hang Lin <sup>1,3,4,\*</sup> and Rocky S. Tuan <sup>4,5,\*</sup>

**Table S1.** Composition of media used for cell maintenance and tri-lineage differentiation assay.

| Medium                   | Composition                                                                                                                                                                                                                                                                                   |
|--------------------------|-----------------------------------------------------------------------------------------------------------------------------------------------------------------------------------------------------------------------------------------------------------------------------------------------|
| <b>GM-MS<sup>1</sup></b> | High-glucose Dulbecco's Modified Eagle's Medium (DMEM, Gibco)<br>10% (v/v) fetal bovine serum (FBS, Gemini Bioproducts)<br>1X antibiotic-antimycotic (Gibco)<br>1.5 ng/mL fibroblast growth factor-2 (FGF2, RayBiotech)                                                                       |
| <b>GM-iMPC</b>           | DMEM/F-12 (Gibco)<br>10% (v/v) fetal bovine serum<br>1X antibiotic-antimycotic<br>1.5 ng/mL FGF2                                                                                                                                                                                              |
| <b>OIM</b>               | High-glucose DMEM<br>10% (v/v) FBS<br>1X antibiotic-antimycotic<br>0.1 $\mu$ M dexamethasone (Sigma-Aldrich)<br>10 mM $\beta$ -glycerophosphate (Sigma-Aldrich)<br>50 $\mu$ g/mL L-ascorbic acid (Sigma-Aldrich)                                                                              |
| <b>CIM<sup>2</sup></b>   | High-glucose DMEM<br>1X antibiotic-antimycotic<br>0.1 $\mu$ M dexamethasone<br>40 $\mu$ g/mL L-proline (Sigma-Aldrich)<br>1X Insulin-Transferrin-Selenium-Ethanolamine (ITS, Gibco)<br>50 $\mu$ g/mL L-ascorbic acid<br>10 ng/mL transforming growth factor beta-3 (TGF $\beta$ 3, Peprotech) |
| <b>AIM</b>               | DMEM<br>10% (v/v) FBS<br>1X antibiotic-antimycotic<br>1 $\mu$ M dexamethasone<br>0.1X ITS<br>0.5 mM 3-isobutyl-1-methylxanthine (IBMX, Sigma-Aldrich)                                                                                                                                         |

<sup>1</sup>GM-MS without FGF2 was used for the control group for osteo- and adipo-induction in 2D cultures.

<sup>2</sup>CIM without TGF $\beta$ 3 was utilized for the control group for chondro-induction in 2D cultures.

**Table S2.** Composition of media used to induce MSC and iMPC differentiation to form different organoids.

| <b>Medium</b>                              | <b>Composition</b>                                                                                                                                                                                                                      |
|--------------------------------------------|-----------------------------------------------------------------------------------------------------------------------------------------------------------------------------------------------------------------------------------------|
| <b>Control medium for MSC<sup>1</sup></b>  | High-glucose DMEM<br>10% (v/v) FBS<br>1X antibiotic-antimycotic                                                                                                                                                                         |
| <b>Control medium for iMPC<sup>2</sup></b> | DMEM/F-12<br>10% (v/v) FBS<br>1X antibiotic-antimycotic<br>1.5 ng/mL FGF2                                                                                                                                                               |
| <b>OM-MSC / OM-iMPC</b>                    | High-glucose DMEM<br>10% (v/v) FBS<br>1X antibiotic-antimycotic<br>0.1 $\mu$ M dexamethasone<br>10 mM $\beta$ -glycerophosphate<br>50 $\mu$ g/mL L-ascorbic acid<br>10 nM 1,25-dihydroxy vitamin D3 (Sigma-Aldrich)                     |
| <b>CM-MSC</b>                              | High-glucose DMEM<br>1X antibiotic-antimycotic<br>0.1 $\mu$ M dexamethasone<br>40 $\mu$ g/mL L-proline<br>1X ITS<br>50 $\mu$ g/mL L-ascorbic acid<br>10 ng/mL TGF $\beta$ 3                                                             |
| <b>CM-iMPC</b>                             | High-glucose DMEM<br>1X antibiotic-antimycotic<br>0.1 $\mu$ M dexamethasone<br>40 $\mu$ g/mL L-proline<br>1X ITS<br>50 $\mu$ g/mL L-ascorbic acid<br>10 ng/mL TGF $\beta$ 3<br>100 ng/mL bone morphogenetic protein 6 (BMP6, PeproTech) |
| <b>AM-MSC / AM-iMPC</b>                    | Minimum Essential Medium $\alpha$<br>10% (v/v) FBS<br>1X antibiotic-antimycotic<br>0.1 $\mu$ M dexamethasone<br>0.2 mM indomethacin (Sigma-Aldrich)<br>0.1X ITS<br>0.45 mM IBMX                                                         |

<sup>1</sup>Used as the control medium for OM-MSC and AM-MSC; CM-MSC with 10  $\mu$ M kartogenin (Sigma-Aldrich) but without TGF $\beta$ 3 was utilized as the control medium for CM-MSC.

<sup>2</sup>Used as the control medium for OM-iMPC and AM-iMPC; CM-iMPC without TGF $\beta$ 3 and BMP6 was utilized as the control medium CM-iMPC.

**Table S3.** Primer sequences used for RT-qPCR.

| <b>Gene</b>    | <b>Forward primer (5'-&gt;3')</b> | <b>Reverse primer (5'-&gt;3')</b> |
|----------------|-----------------------------------|-----------------------------------|
| <i>RPL13A</i>  | GCCATCGTGGCTAAACAGGTA             | GTTGGTGTTTCATCCGCTTGC             |
| <i>OCN</i>     | TCACACTCCTCGCCCTATTG              | GAAGAGGAAAGAAGGGTGCC              |
| <i>OPN</i>     | TCACCAGTCTGATGAGTCTCACCATTC       | TAGCATCAGGGTACTGGATGTCAGGTC       |
| <i>BSP2</i>    | CGAATACACGGGCGTCAATG              | GTAGCTGTACTCATCTTCATAGGC          |
| <i>BMP2</i>    | ACTACCAGAAACGAGTGGGAA             | GCATCTGTTCTCGGAAAACCT             |
| <i>ALP</i>     | ATCTTTGGTCTGGCCCCCATG             | AGTCCACCATGGAGACATTCTCTC          |
| <i>RUNX2</i>   | GTGATAAATTCAGAAGGGAGG             | CTTTTGCTAATGCTTCGTGT              |
| <i>COL2</i>    | GGATGGCTGCACGAAACATACCGG          | CAAGAAGCAGACCGGCCCTATG            |
| <i>ACAN</i>    | AGTCACACCTGAGCAGCATC              | AGTTCTCAAATTGCATGGGGTGTC          |
| <i>SOX9</i>    | GGCGGAGGAAGTCGGTGAAGAA            | GCTCATGCCGGAGGAGGAGTGT            |
| <i>PPARG1</i>  | GACAGGAAAGACAACAGACAAATC          | GGGGTGATGTGTTTGAACCTG             |
| <i>LPL</i>     | GAGATTTCTCTGTATGGCACTG            | CTGCAAATGAGACACTTTCTC             |
| <i>ADIPOQ</i>  | AACATGCCCATTCGCTTTAC              | AGAGGCTGACCTTCACATCC              |
| <i>ADIPSIN</i> | GACACCATCGACCACGACC               | GCCACGTCGCAGAGAGTTC               |

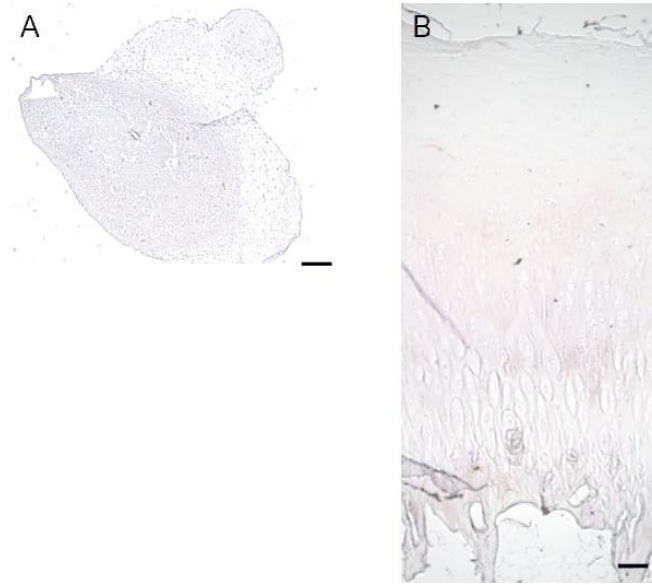

Figure S1. Negative controls for IHC, using mouse immunoglobulin G (IgG) isotypes (0.5  $\mu\text{g/mL}$ ) in place of the primary antibodies. (A) iMPC-derived osteochondral organoid. (B) Native osteochondral tissue. Scale bar = 200  $\mu\text{m}$ .
